# Supplementary material for: Non-Thermal Plasma Application in Tumor-Bearing Mice Induces Increase of Serum HMGB1
Source: MDPI journal article supplement (doi:10.3390/ijms21145128), 2020-07-20
Supplement: s1 [file s1]

## Mycoplasma test of MX-7 cells

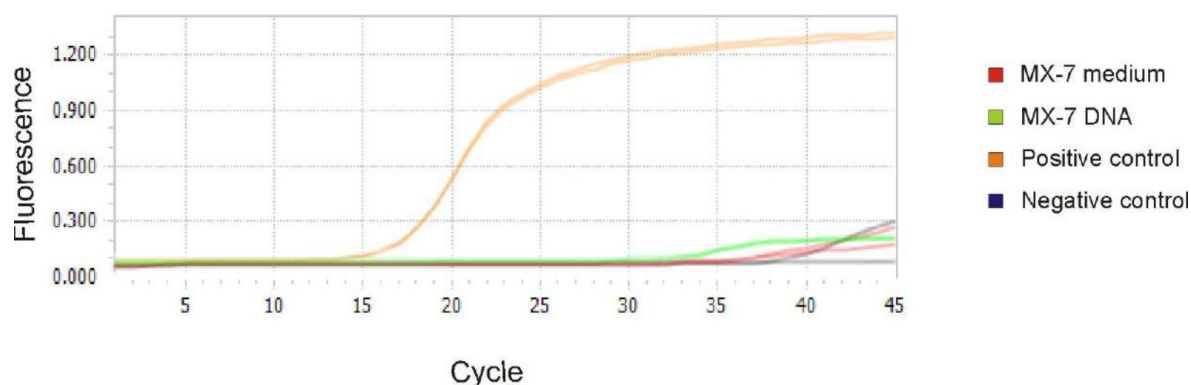

**Supplementary 1.** Mycoplasma test of MX-7 cells. Reverse transcription polymerase chain reaction (RT-PCR) analysis was performed on Light Cycler 96 (Roche, Roche Diagnostics International, Switzerland) and used common models and algorithms for analysis of real-time PCR data with corresponding equipment software. RT-PCR was performed in the one-tube reaction mixture BioMaster RT-PCR SYBR Blue (Biolabmix Ltd., Novosibirsk, Russia, [www.biolabmix.ru](http://www.biolabmix.ru)) with gene-specific primers: Myc-f: 5'GGCGAATGGGTAAGTAACACG3' and 5'CGATAACGCTTGCGACCTAT3'. These primers detected various Mycoplasmas and *Ureaplasma urealyticum*.

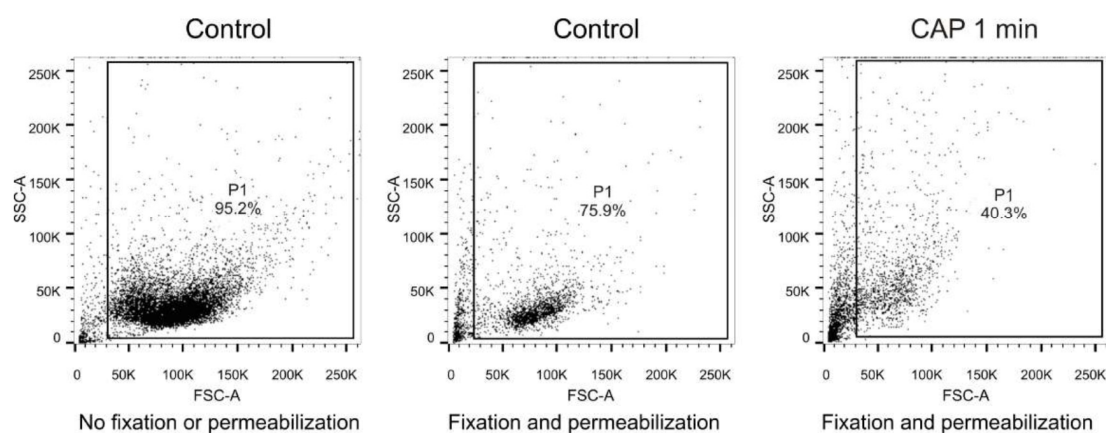

**Supplementary 2.** Analysis of MX-7 control and plasma-treated cells by flow cytometry in SSC/FSC graphs. These graphs were used to gate live cell population (P1) and to exclude debris.
